# Supplementary material for: Physicochemical and excess properties of binary mixtures of (1-alkyl-3-methylimidazoliumchloride/bromide + ethylene glycol) at T = (288.15 to 333.15) K
Source: publisher site journal article supplement (doi:10.1515/chempap-2015-0211), 2015-10-29
Supplement: Supplementary file 1 [file 15_paper_DOI_10.1515chempap-2015-0211_Supplement.docx]

**Supplementary data**

**Physicochemical and excess properties of binary mixtures of (1-alkyl-3-methylimidazoliumchloride/bromide + ethylene glycol) at *T* = (288.15 to 333.15) K**

**aYun-Xia Zhang, a,bShu-Ni Li*, a,bQuan-Guo Zhai, a,bYu-Cheng Jiang, a,bMan-Cheng Hu**[[1]](#footnote-1)*

a*School of Chemistry & Chemical Engineering, Shaanxi Normal University, Xi’an, Shaanxi, 710062, China*

b*Key Laboratory of Macromolecular Science of Shaanxi Province, Xi’an, Shaanxi, 710062, China*

Received 22 May 2015; Revised 13 August 2015; Accepted 13 August 2015

**Table S1** Parameters *A, B, C, D* of equation (1) and the root-mean-square deviations (*σ*) for the four binary mixtures {([C6mim]Br + EG), ([C8mim]Br + EG), ([C6mim]Cl + EG), ([C8mim]Cl + EG)}.

| Function | *T*/K | *A* | *B* | *C* | *D* | 100*σ* |
| --- | --- | --- | --- | --- | --- | --- |
| [C6mim]Br + EG | | | | | | |
| *ρ* | 288.15 | 1.1189 | 0.2817 | -0.2860 | 0.1165 | 0.1020 |
|  | 293.15 | 1.1154 | 0.2811 | -0.2843 | 0.1156 | 0.1030 |
|  | 298.15 | 1.1119 | 0.2807 | -0.2833 | 0.1151 | 0.1020 |
|  | 303.15 | 1.1083 | 0.2806 | -0.2827 | 0.1148 | 0.1020 |
|  | 308.15 | 1.1048 | 0.2807 | -0.2826 | 0.1148 | 0.1010 |
|  | 313.15 | 1.1012 | 0.2808 | -0.2823 | 0.1147 | 0.0997 |
|  | 318.15 | 1.0976 | 0.2811 | -0.2826 | 0.1148 | 0.0987 |
|  | 323.15 | 1.0940 | 0.2815 | -0.2824 | 0.1146 | 0.0972 |
|  | 328.15 | 1.0904 | 0.2820 | -0.2828 | 0.1147 | 0.0962 |
|  | 333.15 | 1.0868 | 0.2827 | -0.2832 | 0.1148 | 0.0959 |
| *n*D | 288.15 | 1.4348 | 0.2479 | -0.2549 | 0.1072 | 0.1000 |
|  | 293.15 | 1.4334 | 0.2468 | -0.2526 | 0.1059 | 0.1010 |
|  | 298.15 | 1.4319 | 0.2462 | -0.2512 | 0.1049 | 0.0981 |
|  | 303.15 | 1.4304 | 0.2455 | -0.2497 | 0.1041 | 0.0987 |
|  | 308.15 | 1.4288 | 0.2466 | -0.2516 | 0.1050 | 0.0968 |
|  | 313.15 | 1.4273 | 0.2465 | -0.2509 | 0.1046 | 0.0971 |
|  | 318.15 | 1.4257 | 0.2467 | -0.2513 | 0.1049 | 0.0965 |
|  | 323.15 | 1.4242 | 0.2471 | -0.2515 | 0.1047 | 0.0963 |
|  | 328.15 | 1.4227 | 0.2474 | -0.2517 | 0.1047 | 0.1010 |
|  | 333.15 | 1.4213 | 0.2486 | -0.2542 | 0.1063 | 0.1100 |
| ln*η* | 288.15 | 3.2962 | -0.2593 | 8.6491 | -3.0611 | 0.9360 |
|  | 293.15 | 3.0725 | -0.2031 | 8.4185 | -3.1799 | 0.8480 |
|  | 298.15 | 2.8510 | 0.1012 | 7.5718 | -2.8640 | 1.1700 |
|  | 303.15 | 2.6561 | 0.1730 | 7.2151 | -2.8131 | 1.0100 |
|  | 308.15 | 2.4652 | 0.3653 | 6.6328 | -2.6308 | 0.8960 |
|  | 313.15 | 2.2924 | 0.4718 | 6.2613 | -2.5661 | 0.8090 |
|  | 318.15 | 2.1278 | 0.6281 | 5.7485 | -2.3883 | 0.8270 |
|  | 323.15 | 1.9731 | 0.7577 | 5.3104 | -2.2438 | 0.8480 |
|  | 328.15 | 1.8262 | 0.8893 | 4.8858 | -2.1064 | 0.7190 |
|  | 333.15 | 1.6877 | 0.9808 | 4.5800 | -2.0410 | 0.7650 |
| [C8mim]Br + EG | | | | | | |
| *ρ* | 288.15 | 1.1179 | 0.1374 | -0.1333 | 0.0524 | 0.0528 |
|  | 293.15 | 1.1144 | 0.1369 | -0.1316 | 0.0513 | 0.0525 |
|  | 298.15 | 1.1109 | 0.1364 | -0.1299 | 0.0503 | 0.0527 |
|  | 303.15 | 1.1074 | 0.1361 | -0.1287 | 0.0495 | 0.0521 |
|  | 308.15 | 1.1038 | 0.1361 | -0.1280 | 0.0491 | 0.0518 |
|  | 313.15 | 1.1003 | 0.1362 | -0.1276 | 0.0489 | 0.0508 |
|  | 318.15 | 1.0967 | 0.1365 | -0.1275 | 0.0488 | 0.0501 |
|  | 323.15 | 1.0931 | 0.1369 | -0.1275 | 0.0486 | 0.0491 |
|  | 328.15 | 1.0894 | 0.1375 | -0.1278 | 0.0486 | 0.0482 |
|  | 333.15 | 1.0858 | 0.1384 | -0.1286 | 0.0490 | 0.0474 |
| *n*D | 288.15 | 1.4351 | 0.2453 | -0.2720 | 0.1183 | 0.1190 |
|  | 293.15 | 1.4337 | 0.2451 | -0.2728 | 0.1191 | 0.1170 |
|  | 298.15 | 1.4322 | 0.2444 | -0.2715 | 0.1183 | 0.1150 |
|  | 303.15 | 1.4308 | 0.2445 | -0.2717 | 0.1184 | 0.1150 |
|  | 308.15 | 1.4292 | 0.2445 | -0.2716 | 0.1182 | 0.1150 |
|  | 313.15 | 1.4276 | 0.2441 | -0.2707 | 0.1177 | 0.1140 |
|  | 318.15 | 1.4261 | 0.2443 | -0.2709 | 0.1178 | 0.1140 |
|  | 323.15 | 1.4245 | 0.2444 | -0.2705 | 0.1173 | 0.1120 |
|  | 328.15 | 1.4229 | 0.2453 | -0.2722 | 0.1184 | 0.1130 |
|  | 333.15 | 1.4213 | 0.2471 | -0.2757 | 0.1203 | 0.1140 |
| ln*η* | 288.15 | 3.2887 | 1.0201 | 7.8227 | -2.4624 | 0.6763 |
|  | 293.15 | 3.0699 | 0.9615 | 7.7637 | -2.7035 | 0.7194 |
|  | 298.15 | 2.8596 | 0.9626 | 7.6044 | -2.8723 | 0.5716 |
|  | 303.15 | 2.6573 | 1.0966 | 7.1306 | -2.8051 | 0.6029 |
|  | 308.15 | 2.4748 | 1.1590 | 6.9038 | -2.9493 | 0.6580 |
|  | 313.15 | 2.3002 | 1.2704 | 6.4459 | -2.8437 | 0.4907 |
|  | 318.15 | 2.1381 | 1.3808 | 5.9149 | -2.6471 | 0.2971 |
|  | 323.15 | 1.9850 | 1.4572 | 5.4964 | -2.4563 | 0.4569 |
|  | 328.15 | 1.8367 | 1.5665 | 5.0856 | -2.3371 | 0.3700 |
|  | 333.15 | 1.6956 | 1.6668 | 4.6808 | -2.2001 | 0.3008 |
| [C6mim]Cl + EG | | | | | | |
| *ρ* | 288.15 | 1.1142 | -0.2410 | 0.3223 | -0.1524 | 0.1210 |
|  | 293.15 | 1.1107 | -0.2401 | 0.3221 | -0.1526 | 0.1200 |
|  | 298.15 | 1.1072 | -0.2389 | 0.3212 | -0.1523 | 0.1190 |
|  | 303.15 | 1.1037 | -0.2378 | 0.3204 | -0.1521 | 0.1190 |
|  | 308.15 | 1.1002 | -0.2363 | 0.3191 | -0.1516 | 0.1180 |
|  | 313.15 | 1.0967 | -0.2348 | 0.3176 | -0.1510 | 0.1180 |
|  | 318.15 | 1.0931 | -0.2329 | 0.3155 | -0.1500 | 0.1180 |
|  | 323.15 | 1.0895 | -0.2311 | 0.3134 | -0.1491 | 0.1180 |
|  | 328.15 | 1.0859 | -0.2289 | 0.3107 | -0.1479 | 0.1180 |
|  | 333.15 | 1.0823 | -0.2267 | 0.3083 | -0.1468 | 0.1180 |
| *n*D | 288.15 | 1.4329 | 0.2020 | -0.1965 | 0.0799 | 0.0563 |
|  | 293.15 | 1.4314 | 0.2015 | -0.1953 | 0.0791 | 0.0562 |
|  | 298.15 | 1.4300 | 0.2013 | -0.1948 | 0.0788 | 0.0561 |
|  | 303.15 | 1.4285 | 0.2012 | -0.1945 | 0.0786 | 0.0560 |
|  | 308.15 | 1.4270 | 0.2011 | -0.1943 | 0.0783 | 0.0555 |
|  | 313.15 | 1.4255 | 0.2010 | -0.1940 | 0.0782 | 0.0547 |
|  | 318.15 | 1.4240 | 0.2013 | -0.1943 | 0.0783 | 0.0543 |
|  | 323.15 | 1.4225 | 0.2012 | -0.1942 | 0.0781 | 0.0539 |
|  | 328.15 | 1.4211 | 0.2014 | -0.1942 | 0.0780 | 0.0522 |
|  | 333.15 | 1.4197 | 0.2010 | -0.1925 | 0.0768 | 0.0534 |
| ln*η* | 288.15 | 3.3206 | -1.1029 | 12.7255 | -5.3653 | 4.7100 |
|  | 293.15 | 3.0964 | -0.9373 | 12.1026 | -5.2702 | 4.6700 |
|  | 298.15 | 2.8781 | -0.5477 | 10.5968 | -4.3946 | 3.5900 |
|  | 303.15 | 2.6764 | -0.3744 | 10.0115 | -4.2830 | 3.4700 |
|  | 308.15 | 2.4702 | 0.2581 | 7.7788 | -2.8296 | 1.1500 |
|  | 313.15 | 2.2943 | 0.4145 | 7.2469 | -2.7105 | 1.2500 |
|  | 318.15 | 2.1316 | 0.5767 | 6.7050 | -2.5693 | 1.2100 |
|  | 323.15 | 1.9778 | 0.7389 | 6.1712 | -2.4180 | 0.8710 |
|  | 328.15 | 1.8300 | 0.8788 | 5.6984 | -2.2838 | 0.8870 |
|  | 333.15 | 1.6866 | 0.9592 | 5.4121 | -2.2603 | 1.2500 |
| [C8mim]Cl + EG | | | | | | |
| *ρ* | 288.15 | 1.1127 | -0.3461 | 0.4680 | -0.2212 | 0.1950 |
|  | 293.15 | 1.1092 | -0.3452 | 0.4677 | -0.2213 | 0.1940 |
|  | 298.15 | 1.1057 | -0.3441 | 0.4670 | -0.2211 | 0.1940 |
|  | 303.15 | 1.1022 | -0.3430 | 0.4664 | -0.2211 | 0.1930 |
|  | 308.15 | 1.0987 | -0.3417 | 0.4654 | -0.2208 | 0.1920 |
|  | 313.15 | 1.0951 | -0.3402 | 0.4640 | -0.2202 | 0.1910 |
|  | 318.15 | 1.0916 | -0.3385 | 0.4622 | -0.2194 | 0.1910 |
|  | 323.15 | 1.0880 | -0.3366 | 0.4601 | -0.2185 | 0.1900 |
|  | 328.15 | 1.0844 | -0.3345 | 0.4575 | -0.2173 | 0.1900 |
|  | 333.15 | 1.0808 | -0.3323 | 0.4549 | -0.2161 | 0.1900 |
| *n*D | 288.15 | 1.4335 | 0.1993 | -0.2113 | 0.0893 | 0.0830 |
|  | 293.15 | 1.4320 | 0.1984 | -0.2095 | 0.0884 | 0.0811 |
|  | 298.15 | 1.4304 | 0.1984 | -0.2095 | 0.0884 | 0.0785 |
|  | 303.15 | 1.4289 | 0.1983 | -0.2095 | 0.0884 | 0.0781 |
|  | 308.15 | 1.4274 | 0.1982 | -0.2092 | 0.0883 | 0.0777 |
|  | 313.15 | 1.4260 | 0.1978 | -0.2086 | 0.0879 | 0.0770 |
|  | 318.15 | 1.4244 | 0.1979 | -0.2086 | 0.0878 | 0.0763 |
|  | 323.15 | 1.4230 | 0.1976 | -0.2082 | 0.0876 | 0.0763 |
|  | 328.15 | 1.4216 | 0.1976 | -0.2080 | 0.0873 | 0.0770 |
|  | 333.15 | 1.4202 | 0.1975 | -0.2077 | 0.0872 | 0.0789 |
| ln*η* | 288.15 | 3.2894 | 1.4888 | 6.9275 | -1.8691 | 4.1864 |
|  | 293.15 | 3.0538 | 1.7917 | 5.5103 | -0.7943 | 3.2000 |
|  | 298.15 | 2.8604 | 1.3159 | 6.9946 | -2.4139 | 2.6251 |
|  | 303.15 | 2.6772 | 0.9057 | 7.8991 | -3.2664 | 1.6411 |
|  | 308.15 | 2.4901 | 1.0611 | 7.2385 | -3.0001 | 0.8445 |
|  | 313.15 | 2.3113 | 1.2108 | 6.6797 | -2.8344 | 1.0059 |
|  | 318.15 | 2.1445 | 1.4105 | 5.8514 | -2.4544 | 1.3019 |
|  | 323.15 | 1.9712 | 1.5666 | 5.4333 | -2.3552 | 1.1890 |
|  | 328.15 | 1.8205 | 1.7214 | 4.7727 | -2.0326 | 1.4283 |
|  | 333.15 | 1.6802 | 1.7954 | 4.4343 | -1.9443 | 1.4878 |

, where *n* is the number of experimental points.

**Table S2** Parameters *k*0, 1000*k*1 of equation (2) and the corresponding root-mean-square deviations (*σ*) for the four binary mixtures {([C6mim]Br + EG), ([C8mim]Br + EG), ([C6mim]Cl + EG), ([C8mim]Cl + EG)}.

| *x*1 | *k*0 | 1000*k*1 | 100*σ* |
| --- | --- | --- | --- |
| [C6mim]Br + EG | | | |
| 0.0000 | 1.3229 | -0.7146 | 0.0067 |
| 0.0490 | 1.3388 | -0.7149 | 0.0050 |
| 0.1010 | 1.3535 | -0.7198 | 0.0104 |
| 0.1487 | 1.3613 | -0.7123 | 0.0015 |
| 0.2006 | 1.3708 | -0.7126 | 0.0054 |
| 0.2984 | 1.3834 | -0.7057 | 0.0065 |
| 0.4023 | 1.3929 | -0.6962 | 0.0064 |
| 0.4869 | 1.3999 | -0.6918 | 0.0066 |
| 0.5888 | 1.4074 | -0.6888 | 0.0068 |
| 0.7039 | 1.4157 | -0.6903 | 0.0104 |
| 0.7631 | 1.4160 | -0.6805 | 0.0037 |
| 0.8755 | 1.4197 | -0.6745 | 0.0028 |
| 1.0000 | 1.4232 | -0.6695 | 0.0039 |
| [C8mim]Br + EG | | | |
| 0.0000 | 1.3229 | -0.7146 | 0.0067 |
| 0.0508 | 1.3319 | -0.7171 | 0.0090 |
| 0.1021 | 1.3367 | -0.7125 | 0.0018 |
| 0.1501 | 1.3414 | -0.7119 | 0.0024 |
| 0.1998 | 1.3448 | -0.7084 | 0.0037 |
| 0.2917 | 1.3496 | -0.7013 | 0.0057 |
| 0.4001 | 1.3534 | -0.6913 | 0.0066 |
| 0.4982 | 1.3572 | -0.6870 | 0.0075 |
| 0.5947 | 1.3595 | -0.6805 | 0.0050 |
| 0.6934 | 1.3614 | -0.6754 | 0.0037 |
| 0.7884 | 1.3618 | -0.6677 | 0.0025 |
| 0.8960 | 1.3634 | -0.6643 | 0.0047 |
| 1.0000 | 1.3649 | -0.6630 | 0.0050 |
| [C6mim]Cl + EG | | | |
| 0.0000 | 1.3229 | -0.7146 | 0.0067 |
| 0.0520 | 1.3017 | -0.6919 | 0.0026 |
| 0.0998 | 1.2890 | -0.6837 | 0.0056 |
| 0.1500 | 1.2777 | -0.6743 | 0.0082 |
| 0.2009 | 1.2680 | -0.6638 | 0.0097 |
| 0.2974 | 1.2522 | -0.6413 | 0.0052 |
| 0.3992 | 1.2439 | -0.6340 | 0.0156 |
| 0.4995 | 1.2341 | -0.6156 | 0.0067 |
| 0.5962 | 1.2284 | -0.6072 | 0.0049 |
| 0.6933 | 1.2268 | -0.6101 | 0.0169 |
| 0.7949 | 1.2208 | -0.5981 | 0.0113 |
| 0.8937 | 1.2174 | -0.5931 | 0.0127 |
| 1.0000 | 1.2150 | -0.5913 | 0.0165 |
| [C8mim]Cl + EG | | | |
| 0.0000 | 1.3229 | -0.7146 | 0.0067 |
| 0.0491 | 1.3010 | -0.7102 | 0.0263 |
| 0.0989 | 1.2763 | -0.6798 | 0.0015 |
| 0.1499 | 1.2607 | -0.6680 | 0.0008 |
| 0.2013 | 1.2484 | -0.6582 | 0.0020 |
| 0.3021 | 1.2295 | -0.6387 | 0.0039 |
| 0.3855 | 1.2194 | -0.6287 | 0.0053 |
| 0.4961 | 1.2093 | -0.6174 | 0.0061 |
| 0.6141 | 1.2008 | -0.6064 | 0.0035 |
| 0.6935 | 1.1963 | -0.6004 | 0.0031 |
| 0.7872 | 1.1911 | -0.5924 | 0.0023 |
| 0.8731 | 1.1879 | -0.5892 | 0.0045 |
| 1.0000 | 1.1837 | -0.5846 | 0.0055 |

, where *n* is the number of experimental points.

**Table S3**. Isobaric expansivity *α*P for the four binary mixtures {([C6mim]Br + EG), ([C8mim]Br + EG), ([C6mim]Cl + EG), ([C8mim]Cl + EG)} at *T* = (288.15 to 333.15) K and atmospheric pressure (0.1 MPa).

| *x*1 | 288.15 K | 293.15 K | 298.15 K | 303.15 K | 308.15 K | 313.15 K | 318.15 K | 323.15 K | 328.15 K | 333.15 K |
| --- | --- | --- | --- | --- | --- | --- | --- | --- | --- | --- |
| 104αP/K-1/{[C6mim]Br + EG} | | | | | | | | | | |
| 0.0000 | 6.3975 | 6.4181 | 6.4387 | 6.4595 | 6.4804 | 6.5015 | 6.5227 | 6.5441 | 6.5655 | 6.5872 |
| 0.0490 | 6.3105 | 6.3305 | 6.3506 | 6.3708 | 6.3911 | 6.4116 | 6.4322 | 6.4530 | 6.4739 | 6.4949 |
| 0.1010 | 6.2808 | 6.3006 | 6.3205 | 6.3405 | 6.3607 | 6.3810 | 6.4014 | 6.4219 | 6.4426 | 6.4635 |
| 0.1487 | 6.1615 | 6.1805 | 6.1997 | 6.2190 | 6.2384 | 6.2579 | 6.2775 | 6.2973 | 6.3172 | 6.3372 |
| 0.2006 | 6.1148 | 6.1335 | 6.1524 | 6.1714 | 6.1905 | 6.2097 | 6.2291 | 6.2485 | 6.2681 | 6.2878 |
| 0.2984 | 5.9809 | 5.9989 | 6.0169 | 6.0351 | 6.0533 | 6.0717 | 6.0902 | 6.1088 | 6.1275 | 6.1463 |
| 0.4023 | 5.8395 | 5.8566 | 5.8738 | 5.8911 | 5.9085 | 5.9260 | 5.9436 | 5.9613 | 5.9792 | 5.9971 |
| 0.4869 | 5.7620 | 5.7786 | 5.7954 | 5.8122 | 5.8292 | 5.8462 | 5.8633 | 5.8806 | 5.8979 | 5.9154 |
| 0.5888 | 5.6972 | 5.7134 | 5.7298 | 5.7463 | 5.7628 | 5.7795 | 5.7962 | 5.8131 | 5.8300 | 5.8471 |
| 0.7039 | 5.6730 | 5.6891 | 5.7053 | 5.7217 | 5.7381 | 5.7546 | 5.7712 | 5.7879 | 5.8047 | 5.8216 |
| 0.7631 | 5.5783 | 5.5939 | 5.6095 | 5.6253 | 5.6412 | 5.6571 | 5.6732 | 5.6893 | 5.7056 | 5.7219 |
| 0.8755 | 5.5051 | 5.5203 | 5.5356 | 5.5510 | 5.5664 | 5.5820 | 5.5976 | 5.6133 | 5.6291 | 5.6450 |
| 1.0000 | 5.4422 | 5.4570 | 5.4720 | 5.4870 | 5.5021 | 5.5172 | 5.5325 | 5.5478 | 5.5633 | 5.5788 |
| 104αP/K-1/{[C8mim]Br + EG} | | | | | | | | | | |
| 0.0000 | 6.3975 | 6.4181 | 6.4387 | 6.4595 | 6.4804 | 6.5015 | 6.5227 | 6.5441 | 6.5655 | 6.5872 |
| 0.0508 | 6.3732 | 6.3936 | 6.4141 | 6.4347 | 6.4555 | 6.4764 | 6.4974 | 6.5186 | 6.5399 | 6.5614 |
| 0.1021 | 6.2974 | 6.3172 | 6.3373 | 6.3574 | 6.3777 | 6.3981 | 6.4186 | 6.4393 | 6.4601 | 6.4810 |
| 0.1501 | 6.2648 | 6.2844 | 6.3043 | 6.3242 | 6.3442 | 6.3644 | 6.3848 | 6.4052 | 6.4258 | 6.4465 |
| 0.1998 | 6.2103 | 6.2297 | 6.2492 | 6.2687 | 6.2885 | 6.3083 | 6.3283 | 6.3483 | 6.3686 | 6.3889 |
| 0.2917 | 6.1112 | 6.1300 | 6.1488 | 6.1678 | 6.1869 | 6.2061 | 6.2254 | 6.2448 | 6.2644 | 6.2841 |
| 0.4001 | 5.9892 | 6.0072 | 6.0253 | 6.0435 | 6.0619 | 6.0803 | 6.0988 | 6.1175 | 6.1362 | 6.1551 |
| 0.4982 | 5.9257 | 5.9434 | 5.9611 | 5.9789 | 5.9968 | 6.0148 | 6.0330 | 6.0512 | 6.0696 | 6.0881 |
| 0.5947 | 5.8498 | 5.8670 | 5.8842 | 5.9016 | 5.9191 | 5.9366 | 5.9543 | 5.9721 | 5.9900 | 6.0080 |
| 0.6934 | 5.7888 | 5.8056 | 5.8225 | 5.8395 | 5.8566 | 5.8738 | 5.8911 | 5.9085 | 5.9260 | 5.9436 |
| 0.7884 | 5.7100 | 5.7264 | 5.7428 | 5.7594 | 5.7760 | 5.7927 | 5.8096 | 5.8265 | 5.8435 | 5.8606 |
| 0.8960 | 5.6682 | 5.6843 | 5.7005 | 5.7168 | 5.7332 | 5.7497 | 5.7663 | 5.7830 | 5.7997 | 5.8166 |
| 1.0000 | 5.6475 | 5.6635 | 5.6796 | 5.6958 | 5.7121 | 5.7284 | 5.7449 | 5.7614 | 5.7781 | 5.7948 |
| 104αP/K-1/{[C6mim]Cl + EG} | | | | | | | | | | |
| 0.0000 | 6.3975 | 6.4181 | 6.4387 | 6.4595 | 6.4804 | 6.5015 | 6.5227 | 6.5441 | 6.5655 | 6.5872 |
| 0.0520 | 6.2773 | 6.2970 | 6.3169 | 6.3369 | 6.3571 | 6.3773 | 6.3977 | 6.4183 | 6.4389 | 6.4597 |
| 0.0998 | 6.2604 | 6.2801 | 6.2999 | 6.3198 | 6.3398 | 6.3600 | 6.3803 | 6.4007 | 6.4212 | 6.4419 |
| 0.1500 | 6.2242 | 6.2437 | 6.2632 | 6.2829 | 6.3027 | 6.3226 | 6.3427 | 6.3629 | 6.3832 | 6.4036 |
| 0.2009 | 6.1647 | 6.1837 | 6.2029 | 6.2222 | 6.2416 | 6.2612 | 6.2808 | 6.3006 | 6.3205 | 6.3406 |
| 0.2974 | 6.0082 | 6.0263 | 6.0445 | 6.0628 | 6.0813 | 6.0998 | 6.1185 | 6.1372 | 6.1561 | 6.1751 |
| 0.3992 | 5.9742 | 5.9920 | 6.0101 | 6.0282 | 6.0464 | 6.0647 | 6.0832 | 6.1017 | 6.1204 | 6.1392 |
| 0.4995 | 5.8263 | 5.8433 | 5.8604 | 5.8777 | 5.8950 | 5.9124 | 5.9299 | 5.9476 | 5.9653 | 5.9832 |
| 0.5962 | 5.7639 | 5.7806 | 5.7973 | 5.8142 | 5.8311 | 5.8482 | 5.8653 | 5.8826 | 5.8999 | 5.9174 |
| 0.6933 | 5.8053 | 5.8222 | 5.8392 | 5.8563 | 5.8735 | 5.8908 | 5.9082 | 5.9257 | 5.9433 | 5.9611 |
| 0.7949 | 5.7040 | 5.7203 | 5.7367 | 5.7532 | 5.7698 | 5.7865 | 5.8033 | 5.8201 | 5.8371 | 5.8542 |
| 0.8937 | 5.6678 | 5.6839 | 5.7001 | 5.7164 | 5.7328 | 5.7493 | 5.7658 | 5.7825 | 5.7993 | 5.8161 |
| 1.0000 | 5.6603 | 5.6763 | 5.6925 | 5.7087 | 5.7251 | 5.7415 | 5.7580 | 5.7747 | 5.7914 | 5.8082 |
| 104αP/K-1/{[C8mim]Cl + EG} | | | | | | | | | | |
| 0.0000 | 6.3975 | 6.4181 | 6.4387 | 6.4595 | 6.4804 | 6.5015 | 6.5227 | 6.5441 | 6.5655 | 6.5872 |
| 0.0491 | 6.4781 | 6.4991 | 6.5203 | 6.5416 | 6.5631 | 6.5847 | 6.6065 | 6.6284 | 6.6504 | 6.6726 |
| 0.0989 | 6.2917 | 6.3115 | 6.3315 | 6.3516 | 6.3719 | 6.3922 | 6.4127 | 6.4333 | 6.4541 | 6.4750 |
| 0.1499 | 6.2536 | 6.2732 | 6.2929 | 6.3128 | 6.3328 | 6.3529 | 6.3732 | 6.3935 | 6.4140 | 6.4347 |
| 0.2013 | 6.2165 | 6.2358 | 6.2554 | 6.2750 | 6.2947 | 6.3146 | 6.3346 | 6.3547 | 6.3750 | 6.3954 |
| 0.3021 | 6.1090 | 6.1277 | 6.1465 | 6.1655 | 6.1846 | 6.2037 | 6.2230 | 6.2425 | 6.2620 | 6.2817 |
| 0.3855 | 6.0554 | 6.0738 | 6.0923 | 6.1109 | 6.1296 | 6.1485 | 6.1674 | 6.1865 | 6.2057 | 6.2250 |
| 0.4961 | 5.9864 | 6.0043 | 6.0224 | 6.0406 | 6.0589 | 6.0773 | 6.0958 | 6.1145 | 6.1332 | 6.1521 |
| 0.6141 | 5.9095 | 5.9270 | 5.9446 | 5.9623 | 5.9801 | 5.9981 | 6.0161 | 6.0343 | 6.0525 | 6.0709 |
| 0.6935 | 5.8678 | 5.8851 | 5.9024 | 5.9199 | 5.9375 | 5.9552 | 5.9730 | 5.9908 | 6.0088 | 6.0270 |
| 0.7872 | 5.8053 | 5.8222 | 5.8392 | 5.8563 | 5.8735 | 5.8908 | 5.9082 | 5.9257 | 5.9433 | 5.9610 |
| 0.8731 | 5.7869 | 5.8037 | 5.8206 | 5.8376 | 5.8547 | 5.8719 | 5.8892 | 5.9066 | 5.9241 | 5.9417 |
| 1.0000 | 5.7589 | 5.7755 | 5.7923 | 5.8091 | 5.8260 | 5.8430 | 5.8602 | 5.8774 | 5.8947 | 5.9121 |

**Table S4** Excess molar volume *V*mE, apparent molar volume *V*φ,i (*i* = 1, 2), for the four binary mixtures {([C6mim]Br + EG), ([C8mim]Br + EG), ([C6mim]Cl + EG), ([C8mim]Cl + EG)} at *T* = (288.15 to 333.15) K and atmospheric pressure (0.1 MPa).

| *x*1 | 288.15 K | 293.15 K | 298.15 K | 303.15 K | 308.15 K | 313.15 K | 318.15 K | 323.15 K | 328.15 K | 333.15 K |
| --- | --- | --- | --- | --- | --- | --- | --- | --- | --- | --- |
| 106 *V*mE/(m3·mol-1)/{[C6mim]Br + EG} | | | | | | | | | | |
| 0.0000 | 0.0000 | 0.0000 | 0.0000 | 0.0000 | 0.0000 | 0.0000 | 0.0000 | 0.0000 | 0.0000 | 0.0000 |
| 0.0490 | 0.1063 | 0.1096 | 0.1125 | 0.1147 | 0.1173 | 0.1196 | 0.1221 | 0.1248 | 0.1266 | 0.1285 |
| 0.1010 | 0.2252 | 0.2315 | 0.2379 | 0.2425 | 0.2482 | 0.2543 | 0.2577 | 0.2646 | 0.2682 | 0.2708 |
| 0.1487 | 0.3165 | 0.3253 | 0.3337 | 0.3393 | 0.3465 | 0.3550 | 0.3627 | 0.3703 | 0.3759 | 0.3811 |
| 0.2006 | 0.3935 | 0.4043 | 0.4148 | 0.4228 | 0.4323 | 0.4417 | 0.4504 | 0.4576 | 0.4644 | 0.4685 |
| 0.2984 | 0.4707 | 0.4839 | 0.4954 | 0.5046 | 0.5152 | 0.5252 | 0.5311 | 0.5415 | 0.5483 | 0.5530 |
| 0.4023 | 0.4721 | 0.4854 | 0.4989 | 0.5076 | 0.5175 | 0.5269 | 0.5357 | 0.5420 | 0.5454 | 0.5474 |
| 0.4869 | 0.4226 | 0.4389 | 0.4535 | 0.4615 | 0.4723 | 0.4816 | 0.4893 | 0.4944 | 0.4954 | 0.5028 |
| 0.5888 | 0.3356 | 0.3494 | 0.3639 | 0.3732 | 0.3850 | 0.3952 | 0.4027 | 0.4074 | 0.4114 | 0.4141 |
| 0.7039 | 0.2354 | 0.2421 | 0.2470 | 0.2552 | 0.2705 | 0.2816 | 0.2912 | 0.2978 | 0.3014 | 0.3020 |
| 0.7631 | 0.1908 | 0.1913 | 0.2038 | 0.2057 | 0.2153 | 0.2261 | 0.2354 | 0.2417 | 0.2463 | 0.2493 |
| 0.8755 | 0.1041 | 0.1066 | 0.1075 | 0.1086 | 0.1123 | 0.1175 | 0.1241 | 0.1291 | 0.1309 | 0.1326 |
| 1.0000 | 0.0000 | 0.0000 | 0.0000 | 0.0000 | 0.0000 | 0.0000 | 0.0000 | 0.0000 | 0.0000 | 0.0000 |
| 106*V*mE/(m3·mol-1)/{[C8mim]Br + EG} | | | | | | | | | | |
| 0.0000 | 0.0000 | 0.0000 | 0.0000 | 0.0000 | 0.0000 | 0.0000 | 0.0000 | 0.0000 | 0.0000 | 0.0000 |
| 0.0508 | 0.1356 | 0.1394 | 0.1429 | 0.1462 | 0.1502 | 0.1524 | 0.1558 | 0.1604 | 0.1634 | 0.1356 |
| 0.1021 | 0.2645 | 0.2718 | 0.2817 | 0.2888 | 0.2965 | 0.3043 | 0.3112 | 0.3176 | 0.3227 | 0.2645 |
| 0.1501 | 0.3667 | 0.3780 | 0.3888 | 0.3982 | 0.4090 | 0.4189 | 0.4285 | 0.4372 | 0.4443 | 0.3667 |
| 0.1998 | 0.4501 | 0.4624 | 0.4745 | 0.4858 | 0.4982 | 0.5098 | 0.5203 | 0.5309 | 0.5361 | 0.4501 |
| 0.2917 | 0.5326 | 0.5463 | 0.5600 | 0.5731 | 0.5857 | 0.5959 | 0.6068 | 0.6193 | 0.6261 | 0.5326 |
| 0.4001 | 0.5253 | 0.5463 | 0.5609 | 0.5739 | 0.5864 | 0.5978 | 0.6079 | 0.6168 | 0.6209 | 0.5253 |
| 0.4982 | 0.4618 | 0.4775 | 0.4926 | 0.5060 | 0.5191 | 0.5313 | 0.5368 | 0.5439 | 0.5479 | 0.4618 |
| 0.5947 | 0.3683 | 0.3779 | 0.3912 | 0.4043 | 0.4185 | 0.4320 | 0.4411 | 0.4451 | 0.4482 | 0.3683 |
| 0.6934 | 0.2677 | 0.2726 | 0.2787 | 0.2860 | 0.2979 | 0.3092 | 0.3174 | 0.3281 | 0.3346 | 0.2677 |
| 0.7884 | 0.1785 | 0.1810 | 0.1814 | 0.1867 | 0.1954 | 0.2020 | 0.2085 | 0.2164 | 0.2212 | 0.1785 |
| 0.8960 | 0.0810 | 0.0823 | 0.0835 | 0.0846 | 0.0856 | 0.0864 | 0.0891 | 0.0896 | 0.0903 | 0.0810 |
| 1.0000 | 0.0000 | 0.0000 | 0.0000 | 0.0000 | 0.0000 | 0.0000 | 0.0000 | 0.0000 | 0.0000 | 0.0000 |
| 106 *V*mE/(m3·mol-1)/{[C6mim]Cl + EG} | | | | | | | | | | |
| 0.0000 | 0.0000 | 0.0000 | 0.0000 | 0.0000 | 0.0000 | 0.0000 | 0.0000 | 0.0000 | 0.0000 | 0.0000 |
| 0.0520 | 0.1391 | 0.1404 | 0.1428 | 0.1448 | 0.1470 | 0.1490 | 0.1508 | 0.1510 | 0.1510 | 0.1542 |
| 0.0998 | 0.2725 | 0.2756 | 0.2803 | 0.2846 | 0.2889 | 0.2931 | 0.2973 | 0.3008 | 0.3049 | 0.3074 |
| 0.1500 | 0.3932 | 0.4025 | 0.4061 | 0.4152 | 0.4215 | 0.4274 | 0.4327 | 0.4382 | 0.4431 | 0.4457 |
| 0.2010 | 0.4665 | 0.4727 | 0.4809 | 0.4879 | 0.4954 | 0.5025 | 0.5084 | 0.5147 | 0.5174 | 0.5250 |
| 0.2974 | 0.5453 | 0.5523 | 0.5613 | 0.5691 | 0.5768 | 0.5834 | 0.5900 | 0.5956 | 0.5991 | 0.6047 |
| 0.3993 | 0.5205 | 0.5283 | 0.5379 | 0.5450 | 0.5524 | 0.5589 | 0.5635 | 0.5682 | 0.5720 | 0.5740 |
| 0.4995 | 0.4388 | 0.4456 | 0.4572 | 0.4650 | 0.4733 | 0.4797 | 0.4841 | 0.4878 | 0.4907 | 0.4919 |
| 0.5962 | 0.3462 | 0.3478 | 0.3550 | 0.3634 | 0.3713 | 0.3759 | 0.3867 | 0.3915 | 0.3943 | 0.3953 |
| 0.6934 | 0.2562 | 0.2537 | 0.2562 | 0.2585 | 0.2649 | 0.2708 | 0.2778 | 0.2844 | 0.2891 | 0.2904 |
| 0.7949 | 0.1617 | 0.1570 | 0.1582 | 0.1560 | 0.1568 | 0.1588 | 0.1622 | 0.1669 | 0.1730 | 0.1789 |
| 0.8937 | 0.0818 | 0.0760 | 0.0767 | 0.0756 | 0.0761 | 0.0711 | 0.0766 | 0.0784 | 0.0818 | 0.0851 |
| 1.0000 | 0.0000 | 0.0000 | 0.0000 | 0.0000 | 0.0000 | 0.0000 | 0.0000 | 0.0000 | 0.0000 | 0.0000 |
| 106*V*mE/(m3·mol-1)/{[C8mim]Cl + EG} | | | | | | | | | | |
| 0.0000 | 0.0000 | 0.0000 | 0.0000 | 0.0000 | 0.0000 | 0.0000 | 0.0000 | 0.0000 | 0.0000 | 0.0000 |
| 0.0491 | 0.1588 | 0.1609 | 0.1640 | 0.1663 | 0.1690 | 0.1711 | 0.1741 | 0.1762 | 0.1786 | 0.1804 |
| 0.0989 | 0.3073 | 0.3130 | 0.3194 | 0.3247 | 0.3303 | 0.3362 | 0.3415 | 0.3472 | 0.3524 | 0.3559 |
| 0.1499 | 0.4352 | 0.4437 | 0.4526 | 0.4601 | 0.4683 | 0.4764 | 0.4840 | 0.4917 | 0.4989 | 0.5063 |
| 0.2013 | 0.5307 | 0.5413 | 0.5524 | 0.5611 | 0.5708 | 0.5807 | 0.5904 | 0.5985 | 0.6053 | 0.6155 |
| 0.3021 | 0.6317 | 0.6435 | 0.6575 | 0.6671 | 0.6775 | 0.6887 | 0.6978 | 0.7074 | 0.7148 | 0.7226 |
| 0.3855 | 0.6164 | 0.6309 | 0.6409 | 0.6553 | 0.6662 | 0.6759 | 0.6859 | 0.6942 | 0.7003 | 0.7086 |
| 0.4961 | 0.5242 | 0.5403 | 0.5545 | 0.5637 | 0.5748 | 0.5863 | 0.5958 | 0.6034 | 0.6089 | 0.6158 |
| 0.6141 | 0.4011 | 0.4049 | 0.4130 | 0.4168 | 0.4246 | 0.4366 | 0.4464 | 0.4543 | 0.4617 | 0.4681 |
| 0.6935 | 0.3130 | 0.3146 | 0.3192 | 0.3189 | 0.3215 | 0.3287 | 0.3320 | 0.3457 | 0.3536 | 0.3626 |
| 0.7872 | 0.2067 | 0.2074 | 0.2096 | 0.2064 | 0.2066 | 0.2082 | 0.2134 | 0.2164 | 0.2231 | 0.2332 |
| 0.8731 | 0.1088 | 0.1078 | 0.1107 | 0.1055 | 0.1041 | 0.1045 | 0.1068 | 0.1069 | 0.1110 | 0.1170 |
| 1.0000 | 0.0000 | 0.0000 | 0.0000 | 0.0000 | 0.0000 | 0.0000 | 0.0000 | 0.0000 | 0.0000 | 0.0000 |
| 106*V*Ф,1/(m3·mol-1)/{[C6mim]Br + EG} | | | | | | | | | | |
| 0.0490 | 203.0799 | 203.6975 | 204.3090 | 204.9144 | 205.5251 | 206.1293 | 206.7406 | 207.3589 | 207.9623 | 208.5622 |
| 0.1010 | 203.1386 | 203.7536 | 204.3679 | 204.9752 | 205.5878 | 206.2058 | 206.7992 | 207.4314 | 208.0342 | 208.6206 |
| 0.1487 | 203.0370 | 203.6485 | 204.2562 | 204.8554 | 205.4599 | 206.0743 | 206.6865 | 207.3010 | 207.9054 | 208.5016 |
| 0.2006 | 202.8698 | 203.4755 | 204.0791 | 204.6805 | 205.2835 | 205.8879 | 206.4918 | 207.0913 | 207.6918 | 208.2733 |
| 0.2984 | 202.4856 | 203.0818 | 203.6718 | 204.2640 | 204.8556 | 205.4465 | 206.0266 | 206.6252 | 207.2146 | 207.7915 |
| 0.4023 | 202.0817 | 202.6666 | 203.2517 | 203.8347 | 204.4153 | 204.9960 | 205.5784 | 206.1577 | 206.7328 | 207.2991 |
| 0.4869 | 201.7762 | 202.3614 | 202.9429 | 203.5206 | 204.0988 | 204.6753 | 205.2517 | 205.8257 | 206.3945 | 206.9708 |
| 0.5888 | 201.4781 | 202.0534 | 202.6296 | 203.2067 | 203.7826 | 204.3574 | 204.9306 | 205.5021 | 206.0757 | 206.6414 |
| 0.7039 | 201.2426 | 201.8039 | 202.3626 | 202.9354 | 203.5131 | 204.0863 | 204.6604 | 205.2334 | 205.8052 | 206.3674 |
| 0.7631 | 201.1582 | 201.7107 | 202.2787 | 202.8424 | 203.4110 | 203.9826 | 204.5552 | 205.1270 | 205.6997 | 206.2649 |
| 0.8755 | 201.0271 | 201.5818 | 202.1344 | 202.6968 | 203.2571 | 203.8204 | 204.3885 | 204.9578 | 205.5265 | 206.0897 |
| 1.0000 | 200.9082 | 201.4600 | 202.0116 | 202.5728 | 203.1288 | 203.6862 | 204.2467 | 204.8103 | 205.3770 | 205.9382 |
| 106*V*Ф,1/(m3·mol-1)/{[C8mim]Br + EG} | | | | | | | | | | |
| 0.0508 | 237.0501 | 237.7908 | 238.5382 | 239.2809 | 240.0186 | 240.7747 | 241.4927 | 242.2430 | 243.0162 | 243.7618 |
| 0.1021 | 236.9969 | 237.7147 | 238.4583 | 239.2283 | 239.9724 | 240.7233 | 241.4765 | 242.2253 | 242.9716 | 243.7071 |
| 0.1501 | 236.8055 | 237.5661 | 238.3140 | 239.0588 | 239.7955 | 240.5438 | 241.2858 | 242.0317 | 242.7732 | 243.5056 |
| 0.1998 | 236.6399 | 237.3759 | 238.1103 | 238.8432 | 239.5745 | 240.3123 | 241.0464 | 241.7808 | 242.5176 | 243.2290 |
| 0.2917 | 236.2263 | 236.9494 | 237.6692 | 238.3888 | 239.1082 | 239.8274 | 240.5384 | 241.2577 | 241.9844 | 242.6932 |
| 0.4001 | 235.7288 | 236.4364 | 237.1615 | 237.8707 | 238.5776 | 239.2852 | 239.9896 | 240.6967 | 241.4026 | 242.0983 |
| 0.4982 | 235.3497 | 236.0503 | 236.7546 | 237.4575 | 238.1589 | 238.8614 | 239.5618 | 240.2547 | 240.9527 | 241.6462 |
| 0.5947 | 235.0550 | 235.7427 | 236.4316 | 237.1266 | 237.8230 | 238.5231 | 239.2218 | 239.9190 | 240.6093 | 241.3001 |
| 0.6934 | 234.8312 | 235.5096 | 236.1895 | 236.8708 | 237.5558 | 238.2491 | 238.9414 | 239.6350 | 240.3342 | 241.0291 |
| 0.7884 | 234.6714 | 235.3499 | 236.0258 | 236.6989 | 237.3801 | 238.0673 | 238.7516 | 239.4418 | 240.1355 | 240.8271 |
| 0.8960 | 234.5392 | 235.2139 | 235.8882 | 236.5621 | 237.2377 | 237.9151 | 238.5919 | 239.2767 | 239.9610 | 240.6473 |
| 1.0000 | 234.4505 | 235.1235 | 235.7963 | 236.4689 | 237.1433 | 237.8195 | 238.4954 | 239.1773 | 239.8610 | 240.5465 |
| 106*V*Ф,1/(m3·mol-1)/{[C6mim]Cl + EG} | | | | | | | | | | |
| 0.0520 | 196.7732 | 197.3540 | 197.9495 | 198.5392 | 199.1344 | 199.7258 | 200.3132 | 200.8736 | 201.4294 | 202.0424 |
| 0.0998 | 196.8288 | 197.4152 | 198.0116 | 198.6071 | 199.2015 | 199.7968 | 200.3929 | 200.9832 | 201.5809 | 202.1578 |
| 0.1500 | 196.7192 | 197.3367 | 197.9103 | 198.5228 | 199.1168 | 199.7086 | 200.2980 | 200.8899 | 201.4793 | 202.0482 |
| 0.2010 | 196.4198 | 197.0060 | 197.5958 | 198.1830 | 198.7718 | 199.3600 | 199.9435 | 200.5303 | 201.1000 | 201.6895 |
| 0.2974 | 195.9315 | 196.5105 | 197.0899 | 197.6684 | 198.2459 | 198.8212 | 199.3974 | 199.9712 | 200.5394 | 201.1101 |
| 0.3993 | 195.4019 | 195.9769 | 196.5499 | 197.1202 | 197.6903 | 198.2594 | 198.8248 | 199.3918 | 199.9578 | 200.5146 |
| 0.4995 | 194.9766 | 195.5456 | 196.1180 | 196.6859 | 197.2542 | 197.8198 | 198.3828 | 198.9454 | 199.5076 | 200.0616 |
| 0.5962 | 194.6789 | 195.2369 | 195.7982 | 196.3646 | 196.9294 | 197.4899 | 198.0621 | 198.6254 | 199.1866 | 199.7400 |
| 0.6934 | 194.4676 | 195.0194 | 195.5722 | 196.1279 | 196.6887 | 197.2501 | 197.8142 | 198.3790 | 198.9421 | 199.4957 |
| 0.7949 | 194.3016 | 194.8511 | 195.4018 | 195.9513 | 196.5039 | 197.0593 | 197.6175 | 198.1787 | 198.7428 | 199.3020 |
| 0.8937 | 194.1897 | 194.7385 | 195.2885 | 195.8396 | 196.3918 | 196.9391 | 197.4992 | 198.0565 | 198.6167 | 199.1722 |
| 1.0000 | 194.0982 | 194.6536 | 195.2027 | 195.7550 | 196.3067 | 196.8595 | 197.4135 | 197.9688 | 198.5252 | 199.0769 |
| 106*V*Ф,1/(m3·mol-1)/{[C8mim]Cl + EG} | | | | | | | | | | |
| 0.0491 | 230.5468 | 231.2548 | 231.9791 | 232.6983 | 233.4242 | 234.1348 | 234.8668 | 235.5832 | 236.3088 | 237.0088 |
| 0.0989 | 230.4237 | 231.1455 | 231.8719 | 232.5983 | 233.3245 | 234.0530 | 234.7766 | 235.5095 | 236.2373 | 236.9360 |
| 0.1499 | 230.2176 | 230.9392 | 231.6601 | 232.3827 | 233.1070 | 233.8299 | 234.5514 | 235.2768 | 236.0008 | 236.7136 |
| 0.2013 | 229.9511 | 230.6683 | 231.3856 | 232.1010 | 232.8189 | 233.5371 | 234.2556 | 234.9700 | 235.6801 | 236.3942 |
| 0.3021 | 229.4062 | 230.1100 | 230.8181 | 231.5224 | 232.2263 | 232.9321 | 233.6328 | 234.3388 | 235.0395 | 235.7287 |
| 0.3855 | 228.9143 | 229.6164 | 230.3043 | 231.0141 | 231.7119 | 232.4059 | 233.1024 | 233.7983 | 234.4902 | 235.1750 |
| 0.4961 | 228.3719 | 229.0691 | 229.7593 | 230.4504 | 231.1423 | 231.8345 | 232.5241 | 233.2138 | 233.9008 | 234.5783 |
| 0.6141 | 227.9683 | 228.6392 | 229.3142 | 229.9928 | 230.6751 | 231.3635 | 232.0500 | 232.7373 | 233.4253 | 234.0992 |
| 0.6935 | 227.7666 | 228.4336 | 229.1019 | 229.7740 | 230.4473 | 231.1266 | 231.8018 | 232.4959 | 233.1834 | 233.8598 |
| 0.7872 | 227.5778 | 228.2433 | 228.9080 | 229.5764 | 230.2462 | 230.9171 | 231.5942 | 232.2724 | 232.9569 | 233.6332 |
| 0.8731 | 227.4398 | 228.1034 | 228.7684 | 229.4350 | 230.1030 | 230.7723 | 231.4454 | 232.1199 | 232.8006 | 233.4709 |
| 1.0000 | 227.3152 | 227.9799 | 228.6417 | 229.3142 | 229.9838 | 230.6526 | 231.3231 | 231.9975 | 232.6735 | 233.3369 |
| 106*V*Ф,2/(m3·mol-1)/{[C6mim]Br + EG} | | | | | | | | | | |
| 0.0000 | 55.5740 | 55.7492 | 55.9260 | 56.1045 | 56.2846 | 56.4663 | 56.6503 | 56.8366 | 57.0256 | 57.2138 |
| 0.0490 | 55.6858 | 55.8644 | 56.0443 | 56.2250 | 56.4079 | 56.5921 | 56.7787 | 56.9678 | 57.1587 | 57.3489 |
| 0.1010 | 55.8244 | 56.0067 | 56.1906 | 56.3742 | 56.5607 | 56.7492 | 56.9369 | 57.1309 | 57.3240 | 57.5150 |
| 0.1487 | 55.9457 | 56.1313 | 56.3180 | 56.5031 | 56.6916 | 56.8834 | 57.0764 | 57.2715 | 57.4671 | 57.6614 |
| 0.2006 | 56.0663 | 56.2550 | 56.4449 | 56.6334 | 56.8253 | 57.0189 | 57.2138 | 57.4090 | 57.6065 | 57.7998 |
| 0.2984 | 56.2448 | 56.4389 | 56.6321 | 56.8237 | 57.0189 | 57.2149 | 57.4073 | 57.6084 | 57.8071 | 58.0020 |
| 0.4023 | 56.3637 | 56.5612 | 56.7606 | 56.9537 | 57.1503 | 57.3478 | 57.5466 | 57.7433 | 57.9380 | 58.1297 |
| 0.4869 | 56.3977 | 56.6046 | 56.8098 | 57.0038 | 57.2050 | 57.4049 | 57.6040 | 57.8002 | 57.9912 | 58.1937 |
| 0.5888 | 56.3902 | 56.5989 | 56.8110 | 57.0121 | 57.2208 | 57.4275 | 57.6296 | 57.8273 | 58.0262 | 58.2208 |
| 0.7039 | 56.3688 | 56.5665 | 56.7602 | 56.9661 | 57.1978 | 57.4172 | 57.6335 | 57.8423 | 58.0433 | 58.2337 |
| 0.7631 | 56.3795 | 56.5566 | 56.7863 | 56.9728 | 57.1933 | 57.4208 | 57.6440 | 57.8568 | 58.0651 | 58.2660 |
| 0.8755 | 56.4104 | 56.6059 | 56.7896 | 56.9766 | 57.1866 | 57.4100 | 57.6473 | 57.8739 | 58.0771 | 58.2789 |
| 106*V*Ф,2/(m3·mol-1)/{[C8mim]Br + EG} | | | | | | | | | | |
| 0.0000 | 55.5740 | 55.7492 | 55.9260 | 56.1045 | 56.2846 | 56.4663 | 56.6503 | 56.8366 | 57.0256 | 57.2138 |
| 0.0508 | 55.7132 | 55.8920 | 56.0728 | 56.2550 | 56.4385 | 56.6246 | 56.8108 | 57.0007 | 57.1946 | 57.3860 |
| 0.1021 | 55.8635 | 56.0438 | 56.2287 | 56.4182 | 56.6062 | 56.7965 | 56.9893 | 57.1831 | 57.3793 | 57.5731 |
| 0.1501 | 55.9900 | 56.1807 | 56.3708 | 56.5620 | 56.7531 | 56.9476 | 57.1433 | 57.3408 | 57.5401 | 57.7365 |
| 0.1998 | 56.1208 | 56.3117 | 56.5039 | 56.6974 | 56.8917 | 57.0889 | 57.2874 | 57.4868 | 57.6891 | 57.8837 |
| 0.2917 | 56.3052 | 56.5011 | 56.6972 | 56.8950 | 57.0937 | 57.2932 | 57.4916 | 57.6932 | 57.9000 | 58.0977 |
| 0.4001 | 56.4265 | 56.6249 | 56.8366 | 57.0394 | 57.2412 | 57.4439 | 57.6469 | 57.8499 | 58.0538 | 58.2488 |
| 0.4982 | 56.4668 | 56.6695 | 56.8776 | 57.0861 | 57.2930 | 57.5009 | 57.7091 | 57.9063 | 58.1095 | 58.3057 |
| 0.5947 | 56.4611 | 56.6579 | 56.8584 | 57.0698 | 57.2821 | 57.4990 | 57.7163 | 57.9250 | 58.1238 | 58.3197 |
| 0.6934 | 56.4350 | 56.6225 | 56.8152 | 57.0133 | 57.2174 | 57.4379 | 57.6590 | 57.8717 | 58.0958 | 58.3052 |
| 0.7884 | 56.3968 | 56.5929 | 56.7812 | 56.9616 | 57.1670 | 57.3897 | 57.6048 | 57.8219 | 58.0483 | 58.2591 |
| 0.8960 | 56.3383 | 56.5278 | 56.7176 | 56.9075 | 57.0982 | 57.2896 | 57.4812 | 57.6931 | 57.8873 | 58.0823 |
| 106*V*Ф,2/(m3·mol-1)/{[C6mim]Cl + EG} | | | | | | | | | | |
| 0.0000 | 55.6048 | 55.7803 | 55.9568 | 56.1349 | 56.3147 | 56.4967 | 56.6809 | 56.8673 | 57.0560 | 57.2449 |
| 0.0520 | 55.7516 | 55.9284 | 56.1074 | 56.2876 | 56.4698 | 56.6539 | 56.8399 | 57.0266 | 57.2153 | 57.4076 |
| 0.0998 | 55.9075 | 56.0864 | 56.2681 | 56.4511 | 56.6356 | 56.8223 | 57.0111 | 57.2014 | 57.3947 | 57.5864 |
| 0.1500 | 56.0674 | 56.2538 | 56.4346 | 56.6233 | 56.8106 | 56.9995 | 57.1899 | 57.3828 | 57.5773 | 57.7693 |
| 0.2010 | 56.1887 | 56.3719 | 56.5586 | 56.7455 | 56.9346 | 57.1255 | 57.3171 | 57.5115 | 57.7036 | 57.9020 |
| 0.2974 | 56.3809 | 56.5663 | 56.7556 | 56.9449 | 57.1356 | 57.3271 | 57.5207 | 57.7150 | 57.9087 | 58.1056 |
| 0.3993 | 56.4713 | 56.6597 | 56.8521 | 57.0421 | 57.2342 | 57.4270 | 57.6188 | 57.8131 | 58.0081 | 58.2004 |
| 0.4995 | 56.4816 | 56.6705 | 56.8701 | 57.0639 | 57.2603 | 57.4551 | 57.6481 | 57.8420 | 58.0365 | 58.2277 |
| 0.5962 | 56.4622 | 56.6415 | 56.8359 | 57.0348 | 57.2341 | 57.4274 | 57.6384 | 57.8368 | 58.0325 | 58.2239 |
| 0.6934 | 56.4403 | 56.6075 | 56.7921 | 56.9780 | 57.1785 | 57.3798 | 57.5869 | 57.7948 | 57.9987 | 58.1919 |
| 0.7949 | 56.3932 | 56.5459 | 56.7280 | 56.8956 | 57.0790 | 57.2709 | 57.4715 | 57.6809 | 57.8994 | 58.1173 |
| 0.8937 | 56.3744 | 56.4945 | 56.6777 | 56.8457 | 57.0302 | 57.1656 | 57.4011 | 57.6043 | 57.8253 | 58.0456 |
| 106*V*Ф,2/(m3·mol-1)/{[C8mim]Cl + EG} | | | | | | | | | | |
| 0.0000 | 55.6048 | 55.7803 | 55.9568 | 56.1349 | 56.3147 | 56.4967 | 56.6809 | 56.8673 | 57.0560 | 57.2449 |
| 0.0491 | 55.7718 | 55.9495 | 56.1292 | 56.3098 | 56.4925 | 56.6766 | 56.8639 | 57.0526 | 57.2438 | 57.4346 |
| 0.0989 | 55.9459 | 56.1276 | 56.3112 | 56.4952 | 56.6813 | 56.8698 | 57.0598 | 57.2526 | 57.4470 | 57.6398 |
| 0.1499 | 56.1168 | 56.3022 | 56.4892 | 56.6762 | 56.8656 | 57.0571 | 57.2503 | 57.4457 | 57.6429 | 57.8405 |
| 0.2013 | 56.2693 | 56.4579 | 56.6484 | 56.8374 | 57.0294 | 57.2238 | 57.4201 | 57.6166 | 57.8139 | 58.0156 |
| 0.3021 | 56.5101 | 56.7024 | 56.8989 | 57.0909 | 57.2855 | 57.4835 | 57.6807 | 57.8809 | 58.0803 | 58.2804 |
| 0.3855 | 56.6080 | 56.8069 | 56.9997 | 57.2013 | 57.3988 | 57.5965 | 57.7970 | 57.9969 | 58.1957 | 58.3980 |
| 0.4961 | 56.6452 | 56.8526 | 57.0571 | 57.2535 | 57.4553 | 57.6602 | 57.8632 | 58.0648 | 58.2643 | 58.4671 |
| 0.6141 | 56.6442 | 56.8296 | 57.0271 | 57.2150 | 57.4151 | 57.6280 | 57.8378 | 58.0448 | 58.2526 | 58.4581 |
| 0.6935 | 56.6262 | 56.8067 | 56.9981 | 57.1754 | 57.3635 | 57.5691 | 57.7640 | 57.9950 | 58.2098 | 58.4281 |
| 0.7872 | 56.5760 | 56.7547 | 56.9418 | 57.1049 | 57.2853 | 57.4749 | 57.6834 | 57.8842 | 58.1042 | 58.3406 |
| 0.8731 | 56.4620 | 56.6294 | 56.8285 | 56.9657 | 57.1346 | 57.3198 | 57.5221 | 57.7093 | 57.9304 | 58.1662 |

**The expanded uncertainties are *u*(*x*1) = 1·10-4, *u*(*V*mE) = 6·10-3 cm3·mol-1, *u*(*V*Ф,i) = 3·10-3 cm3·mol-1, *u*(*T*ρ,n) = ± 0.03 K, *u*(*T*η) = ± 0.05 K and *u*(*p*o) = 0.1 MPa (0.68 level of confidence).**

**Table S5** The deviation in refractive index Δ*n*D, for the four binary mixtures {([C6mim]Br + EG), ([C8mim]Br + EG), ([C6mim]Cl + EG), ([C8mim]Cl + EG)} at *T* = (288.15 to 333.15) K and atmospheric pressure (0.1 MPa).

| *x*1 | 288.15 K | 293.15 K | 298.15 K | 303.15 K | 308.15 K | 313.15 K | 318.15 K | 323.15 K | 328.15 K | 333.15 K |
| --- | --- | --- | --- | --- | --- | --- | --- | --- | --- | --- |
| Δ*n*D/{[C6mim]Br + EG} | | | | | | | | | | |
| 0.0000 | 0.0000 | 0.0000 | 0.0000 | 0.0000 | 0.0000 | 0.0000 | 0.0000 | 0.0000 | 0.0000 | 0.0000 |
| 0.0490 | 0.0090 | 0.0089 | 0.0088 | 0.0087 | 0.0086 | 0.0086 | 0.0087 | 0.0088 | 0.0092 | 0.0093 |
| 0.1010 | 0.0153 | 0.0153 | 0.0152 | 0.0151 | 0.0151 | 0.0152 | 0.0153 | 0.0153 | 0.0156 | 0.0158 |
| 0.1487 | 0.0196 | 0.0195 | 0.0194 | 0.0194 | 0.0195 | 0.0195 | 0.0195 | 0.0195 | 0.0196 | 0.0196 |
| 0.2006 | 0.0225 | 0.0222 | 0.0220 | 0.0220 | 0.0221 | 0.0221 | 0.0222 | 0.0223 | 0.0225 | 0.0231 |
| 0.2984 | 0.0257 | 0.0256 | 0.0256 | 0.0255 | 0.0255 | 0.0254 | 0.0253 | 0.0253 | 0.0254 | 0.0254 |
| 0.4023 | 0.0253 | 0.0253 | 0.0252 | 0.0249 | 0.0252 | 0.0253 | 0.0253 | 0.0254 | 0.0255 | 0.0257 |
| 0.4869 | 0.0241 | 0.0238 | 0.0238 | 0.0238 | 0.0239 | 0.0240 | 0.0240 | 0.0242 | 0.0244 | 0.0244 |
| 0.5888 | 0.0215 | 0.0214 | 0.0214 | 0.0214 | 0.0215 | 0.0215 | 0.0216 | 0.0217 | 0.0219 | 0.0219 |
| 0.7039 | 0.0166 | 0.0167 | 0.0167 | 0.0166 | 0.0167 | 0.0167 | 0.0166 | 0.0167 | 0.0168 | 0.0167 |
| 0.7631 | 0.0140 | 0.0140 | 0.0139 | 0.0139 | 0.0140 | 0.0140 | 0.0139 | 0.0140 | 0.0141 | 0.0141 |
| 0.8755 | 0.0080 | 0.0080 | 0.0080 | 0.0080 | 0.0080 | 0.0080 | 0.0078 | 0.0079 | 0.0080 | 0.0087 |
| 1.0000 | 0.0000 | 0.0000 | 0.0000 | 0.0000 | 0.0000 | 0.0000 | 0.0000 | 0.0000 | 0.0000 | 0.0000 |
| Δ*n*D/{[C8mim]Br + EG} | | | | | | | | | | |
| 0.0000 | 0.0000 | 0.0000 | 0.0000 | 0.0000 | 0.0000 | 0.0000 | 0.0000 | 0.0000 | 0.0000 | 0.0000 |
| 0.0508 | 0.0097 | 0.0097 | 0.0096 | 0.0096 | 0.0097 | 0.0098 | 0.0098 | 0.0099 | 0.0101 | 0.0101 |
| 0.1021 | 0.0168 | 0.0167 | 0.0166 | 0.0165 | 0.0164 | 0.0163 | 0.0164 | 0.0164 | 0.0164 | 0.0163 |
| 0.1501 | 0.0203 | 0.0203 | 0.0202 | 0.0202 | 0.0203 | 0.0204 | 0.0205 | 0.0205 | 0.0207 | 0.0209 |
| 0.1998 | 0.0237 | 0.0235 | 0.0234 | 0.0236 | 0.0236 | 0.0234 | 0.0234 | 0.0233 | 0.0232 | 0.0232 |
| 0.2917 | 0.0260 | 0.0259 | 0.0258 | 0.0258 | 0.0258 | 0.0258 | 0.0259 | 0.0259 | 0.0261 | 0.0266 |
| 0.4001 | 0.0262 | 0.0261 | 0.0260 | 0.0259 | 0.0259 | 0.0259 | 0.0260 | 0.0260 | 0.0262 | 0.0262 |
| 0.4982 | 0.0236 | 0.0236 | 0.0236 | 0.0235 | 0.0236 | 0.0236 | 0.0237 | 0.0240 | 0.0242 | 0.0242 |
| 0.5947 | 0.0215 | 0.0210 | 0.0211 | 0.0211 | 0.0212 | 0.0211 | 0.0211 | 0.0210 | 0.0208 | 0.0207 |
| 0.6934 | 0.0171 | 0.0171 | 0.0171 | 0.0171 | 0.0171 | 0.0171 | 0.0172 | 0.0172 | 0.0172 | 0.0176 |
| 0.7884 | 0.0128 | 0.0126 | 0.0126 | 0.0126 | 0.0126 | 0.0126 | 0.0126 | 0.0127 | 0.0128 | 0.0127 |
| 0.8960 | 0.0067 | 0.0064 | 0.0064 | 0.0064 | 0.0064 | 0.0064 | 0.0064 | 0.0064 | 0.0064 | 0.0064 |
| 1.0000 | 0.0000 | 0.0000 | 0.0000 | 0.0000 | 0.0000 | 0.0000 | 0.0000 | 0.0000 | 0.0000 | 0.0000 |
| Δ*n*D/{[C6mim]Cl + EG} | | | | | | | | | | |
| 0.0000 | 0.0000 | 0.0000 | 0.0000 | 0.0000 | 0.0000 | 0.0000 | 0.0000 | 0.0000 | 0.0000 | 0.0000 |
| 0.0520 | 0.0068 | 0.0068 | 0.0068 | 0.0068 | 0.0068 | 0.0068 | 0.0068 | 0.0068 | 0.0068 | 0.0068 |
| 0.0998 | 0.0115 | 0.0114 | 0.0114 | 0.0114 | 0.0115 | 0.0114 | 0.0115 | 0.0115 | 0.0115 | 0.0115 |
| 0.1500 | 0.0151 | 0.0151 | 0.0151 | 0.0150 | 0.0150 | 0.0150 | 0.0150 | 0.0149 | 0.0149 | 0.0148 |
| 0.2010 | 0.0172 | 0.0171 | 0.0171 | 0.0171 | 0.0171 | 0.0171 | 0.0171 | 0.0171 | 0.0172 | 0.0171 |
| 0.2974 | 0.0199 | 0.0198 | 0.0198 | 0.0198 | 0.0198 | 0.0199 | 0.0199 | 0.0199 | 0.0200 | 0.0200 |
| 0.3993 | 0.0205 | 0.0205 | 0.0205 | 0.0205 | 0.0205 | 0.0205 | 0.0205 | 0.0205 | 0.0205 | 0.0206 |
| 0.4995 | 0.0193 | 0.0193 | 0.0193 | 0.0193 | 0.0193 | 0.0193 | 0.0194 | 0.0194 | 0.0195 | 0.0195 |
| 0.5962 | 0.0172 | 0.0172 | 0.0172 | 0.0173 | 0.0173 | 0.0173 | 0.0174 | 0.0174 | 0.0175 | 0.0175 |
| 0.6934 | 0.0138 | 0.0138 | 0.0138 | 0.0138 | 0.0138 | 0.0138 | 0.0138 | 0.0138 | 0.0139 | 0.0140 |
| 0.7949 | 0.0100 | 0.0100 | 0.0100 | 0.0101 | 0.0101 | 0.0101 | 0.0101 | 0.0101 | 0.0100 | 0.0102 |
| 0.8937 | 0.0050 | 0.0050 | 0.0050 | 0.0050 | 0.0050 | 0.0050 | 0.0050 | 0.0050 | 0.0051 | 0.0053 |
| 1.0000 | 0.0000 | 0.0000 | 0.0000 | 0.0000 | 0.0000 | 0.0000 | 0.0000 | 0.0000 | 0.0000 | 0.0000 |
| Δ*n*D/{[C8mim]Cl + EG} | | | | | | | | | | |
| 0.0000 | 0.0000 | 0.0000 | 0.0000 | 0.0000 | 0.0000 | 0.0000 | 0.0000 | 0.0000 | 0.0000 | 0.0000 |
| 0.0491 | 0.0075 | 0.0074 | 0.0073 | 0.0072 | 0.0072 | 0.0072 | 0.0072 | 0.0073 | 0.0073 | 0.0073 |
| 0.0989 | 0.0128 | 0.0126 | 0.0125 | 0.0125 | 0.0125 | 0.0125 | 0.0125 | 0.0124 | 0.0125 | 0.0125 |
| 0.1499 | 0.0162 | 0.0162 | 0.0162 | 0.0162 | 0.0161 | 0.0161 | 0.0160 | 0.0160 | 0.0159 | 0.0159 |
| 0.2013 | 0.0186 | 0.0186 | 0.0183 | 0.0183 | 0.0183 | 0.0183 | 0.0183 | 0.0182 | 0.0184 | 0.0185 |
| 0.3021 | 0.0208 | 0.0205 | 0.0206 | 0.0205 | 0.0205 | 0.0205 | 0.0206 | 0.0206 | 0.0207 | 0.0207 |
| 0.3855 | 0.0210 | 0.0209 | 0.0208 | 0.0208 | 0.0208 | 0.0207 | 0.0207 | 0.0207 | 0.0207 | 0.0206 |
| 0.4961 | 0.0198 | 0.0197 | 0.0196 | 0.0196 | 0.0196 | 0.0196 | 0.0196 | 0.0196 | 0.0196 | 0.0196 |
| 0.6141 | 0.0166 | 0.0165 | 0.0164 | 0.0164 | 0.0165 | 0.0165 | 0.0165 | 0.0165 | 0.0166 | 0.0167 |
| 0.6935 | 0.0142 | 0.0141 | 0.0141 | 0.0141 | 0.0140 | 0.0140 | 0.0141 | 0.0140 | 0.0141 | 0.0141 |
| 0.7872 | 0.0103 | 0.0102 | 0.0102 | 0.0101 | 0.0101 | 0.0101 | 0.0101 | 0.0101 | 0.0101 | 0.0102 |
| 0.8731 | 0.0061 | 0.0060 | 0.0060 | 0.0060 | 0.0060 | 0.0060 | 0.0060 | 0.0060 | 0.0061 | 0.0062 |
| 1.0000 | 0.0000 | 0.0000 | 0.0000 | 0.0000 | 0.0000 | 0.0000 | 0.0000 | 0.0000 | 0.0000 | 0.0000 |

**Table S6** Parameters *A*0, *A*1, *A*2, *A*3 of Redlich–Kister equationequation (8) and the corresponding root-mean-square deviations (*σ*) for the four binary mixtures {([C6mim]Br + EG), ([C8mim]Br + EG), ([C6mim]Cl + EG), ([C8mim]Cl + EG)}.

| Function | *T*/K | *A*0 | *A*1 | *A*2 | *A*3 | 100*σ* |
| --- | --- | --- | --- | --- | --- | --- |
| [C6mim]Br + EG | | | | | | |
| *V*mE | 288.15 | 1.6613 | -1.5586 | 0.1497 | 1.0054 | 0.3310 |
|  | 293.15 | 1.7183 | -1.5974 | 0.1064 | 0.9937 | 0.2690 |
|  | 298.15 | 1.7750 | -1.6015 | 0.0836 | 0.9465 | 0.3540 |
|  | 303.15 | 1.8124 | -1.6096 | 0.0678 | 0.9081 | 0.3420 |
|  | 308.15 | 1.8611 | -1.5808 | 0.0791 | 0.8351 | 0.4000 |
|  | 313.15 | 1.9019 | -1.5697 | 0.1190 | 0.8063 | 0.4750 |
|  | 318.15 | 1.9337 | -1.5636 | 0.1684 | 0.8111 | 0.5200 |
|  | 323.15 | 1.9564 | -1.5835 | 0.2323 | 0.8334 | 0.5450 |
|  | 328.15 | 1.9694 | -1.5947 | 0.2768 | 0.8306 | 0.6280 |
|  | 333.15 | 1.9846 | -1.6086 | 0.2898 | 0.8315 | 0.6190 |
| Δ*n*D | 288.15 | 0.0950 | -0.0467 | 0.0388 | -0.0235 | 0.0167 |
|  | 293.15 | 0.0947 | -0.0461 | 0.0387 | -0.0233 | 0.0189 |
|  | 298.15 | 0.0946 | -0.0457 | 0.0376 | -0.0228 | 0.0200 |
|  | 303.15 | 0.0943 | -0.0451 | 0.0374 | -0.0231 | 0.0204 |
|  | 308.15 | 0.0948 | -0.0456 | 0.0369 | -0.0225 | 0.0169 |
|  | 313.15 | 0.0949 | -0.0449 | 0.0368 | -0.0246 | 0.0161 |
|  | 318.15 | 0.0949 | -0.0444 | 0.0360 | -0.0274 | 0.0157 |
|  | 323.15 | 0.0954 | -0.0438 | 0.0356 | -0.0292 | 0.0167 |
|  | 328.15 | 0.0959 | -0.0431 | 0.0374 | -0.0329 | 0.0232 |
|  | 333.15 | 0.0958 | -0.0461 | 0.0428 | -0.0239 | 0.0307 |
| [C8mim]Br + EG | | | | | | |
| *V*mE | 288.15 | 1.8080 | -1.6913 | 0.1234 | 0.7630 | 0.4340 |
|  | 293.15 | 1.8567 | -1.7618 | 0.1240 | 0.8186 | 0.4300 |
|  | 298.15 | 1.9163 | -1.8417 | 0.0920 | 0.8784 | 0.3510 |
|  | 303.15 | 1.9727 | -1.8829 | 0.0628 | 0.8428 | 0.2830 |
|  | 308.15 | 2.0264 | -1.9067 | 0.0475 | 0.8156 | 0.3090 |
|  | 313.15 | 2.0823 | -1.8973 | 0.0507 | 0.7304 | 0.3840 |
|  | 318.15 | 2.1341 | -1.8842 | 0.0461 | 0.6378 | 0.4730 |
|  | 323.15 | 2.1684 | -1.8984 | 0.0890 | 0.6184 | 0.5480 |
|  | 328.15 | 2.2013 | -1.9125 | 0.1353 | 0.5960 | 0.6400 |
|  | 333.15 | 2.2190 | -1.9070 | 0.1729 | 0.5482 | 0.7000 |
| Δ*n*D | 288.15 | 0.0956 | -0.0491 | 0.0459 | -0.0301 | 0.0238 |
|  | 293.15 | 0.0951 | -0.0494 | 0.0447 | -0.0307 | 0.0206 |
|  | 298.15 | 0.0950 | -0.0488 | 0.0440 | -0.0315 | 0.0192 |
|  | 303.15 | 0.0950 | -0.0489 | 0.0437 | -0.0314 | 0.0185 |
|  | 308.15 | 0.0951 | -0.0487 | 0.0440 | -0.0318 | 0.0163 |
|  | 313.15 | 0.0951 | -0.0487 | 0.0438 | -0.0313 | 0.0146 |
|  | 318.15 | 0.0952 | -0.0485 | 0.0439 | -0.0322 | 0.0147 |
|  | 323.15 | 0.0956 | -0.0485 | 0.0432 | -0.0321 | 0.0174 |
|  | 328.15 | 0.0957 | -0.0498 | 0.0441 | -0.0298 | 0.0245 |
|  | 333.15 | 0.0963 | -0.0513 | 0.0439 | -0.0279 | 0.0298 |
| [C6mim]Cl + EG | | | | | | |
| *V*mE | 288.15 | 1.7933 | 1.9365 | 0.3708 | -0.9422 | 0.7770 |
|  | 293.15 | 1.8153 | 1.9967 | 0.3252 | -0.9287 | 0.8140 |
|  | 298.15 | 1.8527 | 2.0344 | 0.2947 | -0.9462 | 0.7350 |
|  | 303.15 | 1.8837 | 2.0576 | 0.2675 | -0.8968 | 0.7770 |
|  | 308.15 | 1.9170 | 2.0651 | 0.2524 | -0.8523 | 0.8080 |
|  | 313.15 | 1.9451 | 2.0643 | 0.2273 | -0.7664 | 0.8810 |
|  | 318.15 | 1.9712 | 2.0503 | 0.2535 | -0.7358 | 0.9260 |
|  | 323.15 | 1.9911 | 2.0492 | 0.2810 | -0.7215 | 1.0200 |
|  | 328.15 | 2.0035 | 2.0445 | 0.3247 | -0.7263 | 1.0600 |
|  | 333.15 | 2.0091 | 2.0691 | 0.3899 | -0.7781 | 1.0500 |
| Δ*n*D | 288.15 | 0.0772 | 0.0338 | 0.0196 | 0.0202 | 0.0141 |
|  | 293.15 | 0.0771 | 0.0334 | 0.0195 | 0.0203 | 0.0142 |
|  | 298.15 | 0.0771 | 0.0332 | 0.0194 | 0.0203 | 0.0145 |
|  | 303.15 | 0.0772 | 0.0330 | 0.0192 | 0.0207 | 0.0148 |
|  | 308.15 | 0.0773 | 0.0329 | 0.0191 | 0.0207 | 0.0148 |
|  | 313.15 | 0.0773 | 0.0329 | 0.0188 | 0.0205 | 0.0144 |
|  | 318.15 | 0.0775 | 0.0330 | 0.0187 | 0.0203 | 0.0146 |
|  | 323.15 | 0.0775 | 0.0331 | 0.0188 | 0.0199 | 0.0142 |
|  | 328.15 | 0.0778 | 0.0331 | 0.0184 | 0.0194 | 0.0131 |
|  | 333.15 | 0.0779 | 0.0332 | 0.0197 | 0.0169 | 0.0140 |
| [C8mim]Cl + EG | | | | | | |
| *V*mE | 288.15 | 2.1398 | 2.0648 | 0.2370 | -0.8543 | 0.7570 |
|  | 293.15 | 2.1863 | 2.1431 | 0.1957 | -0.9090 | 0.6590 |
|  | 298.15 | 2.2309 | 2.1931 | 0.1916 | -0.9326 | 0.6240 |
|  | 303.15 | 2.2680 | 2.2647 | 0.1321 | -0.9396 | 0.5820 |
|  | 308.15 | 2.3085 | 2.3053 | 0.0990 | -0.9163 | 0.5520 |
|  | 313.15 | 2.3557 | 2.3150 | 0.0670 | -0.8519 | 0.5740 |
|  | 318.15 | 2.3931 | 2.3379 | 0.0725 | -0.8450 | 0.5710 |
|  | 323.15 | 2.4326 | 2.3204 | 0.0650 | -0.7486 | 0.6770 |
|  | 328.15 | 2.4590 | 2.3124 | 0.1061 | -0.7187 | 0.7330 |
|  | 333.15 | 2.4889 | 2.3213 | 0.1654 | -0.7521 | 0.8140 |
| Δ*n*D | 288.15 | 0.0780 | 0.0361 | 0.0298 | 0.0304 | 0.0118 |
|  | 293.15 | 0.0776 | 0.0355 | 0.0287 | 0.0310 | 0.0124 |
|  | 298.15 | 0.0775 | 0.0359 | 0.0278 | 0.0295 | 0.0116 |
|  | 303.15 | 0.0774 | 0.0358 | 0.0275 | 0.0298 | 0.0108 |
|  | 308.15 | 0.0774 | 0.0357 | 0.0273 | 0.0299 | 0.0095 |
|  | 313.15 | 0.0774 | 0.0355 | 0.0270 | 0.0301 | 0.0091 |
|  | 318.15 | 0.0775 | 0.0356 | 0.0268 | 0.0299 | 0.0096 |
|  | 323.15 | 0.0774 | 0.0356 | 0.0271 | 0.0293 | 0.0093 |
|  | 328.15 | 0.0776 | 0.0356 | 0.0276 | 0.0287 | 0.0090 |
|  | 333.15 | 0.0775 | 0.0356 | 0.0286 | 0.0286 | 0.0101 |

, where *n* is the number of experimental points.

**Fig. S1.** The effect of temperature *T* = (288.15 to 333.15) K and ILs concentration *x*1 on refractive index, *n*D, of the three binary systems {([C6mim]Br (1) + EG (2)), ([C6mim]Cl (1) + EG (2)), ([C8mim]Cl (1) + EG) (2)}. Symbols represent the experimental data, while lines represent the calculated results using equation (1).

**Fig. S2.** The effect of temperature *T* = (288.15 to 333.15) K and ILs concentration *x*1 on viscosity, *η*, of the three binary systems {([C6mim]Br (1) + EG (2)), ([C6mim]Cl (1) + EG (2)), ([C8mim]Cl (1) + EG) (2)}. Symbols represent the experimental data, while lines represent the calculated results using equation (1).

**Fig. S3.** The effect of temperature *T* = (288.15 to 333.15) K on density, *ρ*, of the four binary systems {([C6mim]Br (1) + EG (2)), ([C6mim]Cl (1) + EG (2)), ([C8mim]Cl (1) + EG) (2)}. Symbols represent the experimental data, while lines represent the calculated results using equation (2).

**Fig. S4.** The effect of temperature *T* = (288.15 to 333.15) K and ILs concentration *x*1 on excess molar volume, *V*mE, of the three binary systems {([C6mim]Br (1) + EG (2)), ([C6mim]Cl (1) + EG (2)), ([C8mim]Cl (1) + EG) (2)}. Symbols represent the experimental data, while lines represent the calculated results using equation (8).

**Fig. S5.** The effect of temperature *T* = (288.15 to 333.15) K and ILs concentration *x*1 on apparent molar volumes, *V*φ,1, of the systems {([C6mim]Br (1) + EG (2)), [C8mim]Br (1) + EG (2), ([C6mim]Cl (1) + EG (2)), ([C8mim]Cl (1) + EG) (2)}. Symbols represent the experimental data.

**Fig. S6.** The effect of temperature *T* = (288.15 to 333.15) K and ILs concentration *x*1 on apparent molar volumes, *V*φ,2, of the systems {([C6mim]Br (1) + EG (2)), [C8mim]Br (1) + EG (2), ([C6mim]Cl (1) + EG (2)), ([C8mim]Cl (1) + EG) (2)}. Symbols represent the experimental data

**Fig. S7.** The effect of temperature *T* = (288.15 to 333.15) K and ILs concentration *x*1 on refractive index deviations, Δ*n*D, of the systems {([C6mim]Br (1) + EG (2)), [C8mim]Br (1) + EG (2), ([C6mim]Cl (1) + EG (2)), ([C8mim]Cl (1) + EG) (2)}. Symbols represent the experimental data, while lines represent the calculated results using equation (8).

1. *Corresponding author, e-mail: hmch@snnu.edu.cn [↑](#footnote-ref-1)
